# Supplementary material for: Ethical perceptions towards real-world use of companion robots with older people and people with dementia: survey opinions among younger adults
Source: Springer Nature journal article supplement (doi:10.1186/s12877-020-01641-5), 2020-07-14
Supplement: MOESM1 [file 18182156]

## Supplementary File: Participant likes and dislikes, and further example evidence

### Participants device preferences and reasons (Q1)

| Device          | N  | Reason                       |
|-----------------|----|------------------------------|
| Paro            | 26 | “Reacted to my movements”    |
|                 |    | “Pretty eyes, soft”          |
| Pleo            | 12 | “Needy”                      |
|                 |    | “Interactive and responsive” |
| Joy for All Dog | 20 | “Favourite animal”           |
|                 |    | “Almost like a real dog”     |
| Joy for All Cat | 16 | “Fluffiest”                  |
|                 |    | “Most familiar”              |

### Participant dislikes summary (Q2)

| Reason        | N  | Example                                    |
|---------------|----|--------------------------------------------|
| Texture       | 10 | “Fur could be softer”                      |
|               |    | “Don’t feel real”                          |
|               |    | “Too synthetic”                            |
|               |    | “Unrealistic”                              |
| Internal feel | 5  | “Hard parts in bodies”                     |
|               |    | “Feel plastic under fur”                   |
|               |    | “The hard feeling through their fur”       |
| Movements     | 5  | “Bumpy robot feeling”                      |
|               |    | “Too still”                                |
|               |    | “Random movements, not in response to me”  |
|               |    | “Maybe movements are a little too robotic” |

|                       |   |  | “Too mechanical”                                                                                                                   |
|-----------------------|---|--|------------------------------------------------------------------------------------------------------------------------------------|
| Size/shape            | 1 |  | “Cat and dog awkward to hold”                                                                                                      |
| Fear                  | 3 |  | “Creepy”                                                                                                                           |
|                       |   |  | “Cat scary”                                                                                                                        |
| Cost                  | 1 |  | “Price of seal”                                                                                                                    |
| Noises                | 3 |  | “Dinosaurs noises are annoying”                                                                                                    |
|                       |   |  | “Some noises irritating”                                                                                                           |
|                       |   |  | “Sounds could be better, more sounds”                                                                                              |
| Ethical concern       | 1 |  | “I don't really know if they can be used to alleviate loneliness, and whether robots can replace humans in the aspect of intimacy” |
| Appearance            | 1 |  | “Dog is one colour, not realistic”                                                                                                 |
| Practical/Maintenance | 1 |  | “They can get dirty”                                                                                                               |

**Further evidence of participant responses to open question on general feelings towards companion robots for older people (Q4) – Main text Table 2**

| Response | %     | Example Evidence                                                                                                                                                                                                                                                                                                                                                                                                                                                                                                                                                                                                                                                                                                                                                                                                                                                                                                                                                             |
|----------|-------|------------------------------------------------------------------------------------------------------------------------------------------------------------------------------------------------------------------------------------------------------------------------------------------------------------------------------------------------------------------------------------------------------------------------------------------------------------------------------------------------------------------------------------------------------------------------------------------------------------------------------------------------------------------------------------------------------------------------------------------------------------------------------------------------------------------------------------------------------------------------------------------------------------------------------------------------------------------------------|
| Positive | 65.76 | <p>“It could help them feel more responsible and useful”</p> <p>“I really like the idea, it can re-create the feeling of a pet, even if they couldn’t look after one”</p> <p>“I think anything that could help is a great idea”</p> <p>“It is good if it helps them an I know people with dementia can get stressed”</p> <p>“Great, why not”</p> <p>“Anything that reduces stress is important and beneficial”</p> <p>“They are a fun companion to have around and demand very little care”</p> <p>“I feel it would be great for them to have some comfort from”</p> <p>“I think it would be very therapeutic for them”</p> <p>“Great for people who can’t have animals”</p> <p>“I think it would be very successful providing comfort to my relative with dementia, particularly the dog, for nostalgic purposes”</p> <p>“My neighbour has dementia and misses her cat I would love to give her one for comfort”</p> <p>“Great idea for people who are alone every day”</p> |

|             |       |                                                                                                                                                                                                                                                                                                                                                                                                                                                                                                                                                                                                                                                                                                                                                                                                                                                                                                                                                                                                                                                                                                                                                                       |
|-------------|-------|-----------------------------------------------------------------------------------------------------------------------------------------------------------------------------------------------------------------------------------------------------------------------------------------------------------------------------------------------------------------------------------------------------------------------------------------------------------------------------------------------------------------------------------------------------------------------------------------------------------------------------------------------------------------------------------------------------------------------------------------------------------------------------------------------------------------------------------------------------------------------------------------------------------------------------------------------------------------------------------------------------------------------------------------------------------------------------------------------------------------------------------------------------------------------|
| Mixed       | 14.93 | <p>“In one way I think it's good as its great that it gives everyone an opportunity to touch but on the other hand I think its sad cause it means that there is no real human contact around them to touch them”</p> <p>“conflicted”</p> <p>“I struggle with the concept of replacing care with robotics but in neurodegenerative diseases such as AZ dementia it can be harder on family members sometimes and if it stimulates/soothes them then maybe”</p> <p>“I wouldn't want people to use it as an excuse not to visit their relatives or look after them but think it's a useful thing as someone can't be with them”</p> <p>“I think it is better to have humans nearby, but if the robots are sufficient to alleviate dementia, I think it is a good idea”</p> <p>“A good idea, the problem would be making the robot responsive enough without it being too expensive”</p> <p>“Maybe it can seem strange, but I think that’s a good thing to fight loneliness”</p> <p>“Its sweet and sad, anything that calms them had to be good”</p> <p>“Good concept but I don’t know how the old people would react to it”</p> <p>“Good idea, need to lower prices”</p> |
| Negative    | 7.46  | <p>“Might be more efficient for kids”</p> <p>“I think a real animal would be better”</p> <p>“I would have the thought that it was a bit ridiculous”</p> <p>“I would be slightly worried of infantilising the person, the person may get upset or see it as a trick”</p>                                                                                                                                                                                                                                                                                                                                                                                                                                                                                                                                                                                                                                                                                                                                                                                                                                                                                               |
| No Response | 11.94 |                                                                                                                                                                                                                                                                                                                                                                                                                                                                                                                                                                                                                                                                                                                                                                                                                                                                                                                                                                                                                                                                                                                                                                       |

### Further evidence of unprompted ethical concerns raised (Q5) – Main text Table 3

| Area of Concern | Frequency | Example Evidence                                                                                                                                                                                                                                                                                                                                                                                                                                                                   |
|-----------------|-----------|------------------------------------------------------------------------------------------------------------------------------------------------------------------------------------------------------------------------------------------------------------------------------------------------------------------------------------------------------------------------------------------------------------------------------------------------------------------------------------|
| Batteries       | 2         | “There may be emotional distress if the batteries ran out”                                                                                                                                                                                                                                                                                                                                                                                                                         |
| Malfunction     | 1         | “What happens if they malfunction?”                                                                                                                                                                                                                                                                                                                                                                                                                                                |
| Human Contact   | 7         | <p>“I worry about the idea behind it [sic] social care [sic] is about compassion, if we turn that responsibility over to robotics what sort of society will emerge?”</p> <p>“Might encourage people to be distant from the elderly”</p> <p>“People would rely on them too much and not visit”</p> <p>“I may question [sic] the elderly [sic] deserve interactions with real people”</p> <p>“I hope they would never be used to fill an emotional need that a human would give”</p> |
| Robustness      | 1         | “Toughness, can they withstand a fall?”                                                                                                                                                                                                                                                                                                                                                                                                                                            |

|                 |   |                                                                                                                                                                                                                                                                                                                            |
|-----------------|---|----------------------------------------------------------------------------------------------------------------------------------------------------------------------------------------------------------------------------------------------------------------------------------------------------------------------------|
| Deception       | 4 | <p>“It may confuse them”</p> <p>“In cases of bad dementia, they could become confused as to whether the robot was real or not”</p> <p>“if the person with dementia thought it was real and found out it wasn’t they may be upset.”</p> <p>“Could become agitated during lucid moments if they feel they were lied to.”</p> |
| Privacy         | 1 | “Should not be connected to net (privacy)”                                                                                                                                                                                                                                                                                 |
| Danger          | 2 | <p>“Electrical fault if liquid spilt on them”</p> <p>“Tripping/falling”</p>                                                                                                                                                                                                                                                |
| Dignity         | 2 | <p>“They may try to feed or walk them, potential embarrassment”</p> <p>“I would hate if they felt patronised or like these were used as a substitute for family”</p>                                                                                                                                                       |
| Infantilisation | 1 | “May feel patronised belittled with a fluffy toy”                                                                                                                                                                                                                                                                          |

---
